# Supplementary material
Source: publisher figshare collection journal article supplement (https://karger.figshare.com/ndownloader/files/30807109)
Supplement: Supplementary file 1 [file 30807109]

Table 4S: Definition of intervention and control in included studies

|  | **Pacovsky 2007 [35]** | **Zargar 2005 [34]** | **Zomorrodi 2003 [36]** |
| --- | --- | --- | --- |
| Taguchi ureteroneocystostomy | "The bladder wall is fenestrated by a short incision from outside. The orifice in the bladder wall is as large as the external diameter of the implanted ureter. This orifice is used only for running the transplanted ureter into a bladder cavity. The ureter passage through the wall must be free of strangulation and tension. The implanted ureter is then fixed to the mucous of the internal side of the bladder wall by the only monofilament absorbable stitch." | unclear | “The detrusor muscle was divided by cauterization to expose the mucosa, which was opened by scissors, and the edge of mucosa was separated by stay sutures to acquire good exposure for anastomosis to ureter. At this point, 2-0 vicryl was placed in full thickness from outside to inside the ureter and bladder through the cystostomy incision.” |
| Lich-Gregoir ureteroneocystostomy | "The bladder wall is opened only in an anastomosis location. Suture of the ureter and bladder mucous is on the external side of the bladder wall." | unclear | “The detrusor muscle was divided by cauterization to expose the mucosa, which was opened by scissors, and the edge of mucosa was separated by stay sutures to acquire good exposure for anastomosis to ureter. The anastomosis of ureter to bladder mucosa is then performed by 4-0 vicryl by running sutures up to the distal apex.” |
